# Supplementary material for: Performance of secondary P-fertilizers in pot experiments analyzed by phosphorus X-ray absorption near-edge structure (XANES) spectroscopy
Source: Springer Nature journal article supplement (doi:10.1007/s13280-017-0973-z), 2017-11-20

***Ambio***

Electronic Supplementary Material

*This supplementary has not been peer reviewed.*

Title: **Performance of secondary P-fertilizers in pot experiments analyzed by phosphorus X-ray absorption near edge structure (XANES) spectroscopy**

Authors: Christian Vogel, Camille Rivard, Verena Wilken, Andreas Muskolus, Christian Adam

### Additional to Material and Methods:

#### Secondary P-fertilizer

The element mass fractions of the applied P-fertilizers were analyzed by ICP-OES (CEM Mars express, Kamp-Lintfort, Germany) after aqua regia digestion. The nitrogen content was determined after the combustion method (VDLUFA 3.5.2.7). Chemical extraction tests of these fertilizers were done with water (PW; fertilizer/solution ratio 1:100, 30 min), 2% citric acid (PCIT; fertilizer/solution ratio 1:100, 30 min) and neutral ammonium citrate (PNAC; fertilizer/solution ratio 1:166, 60 min) according to the EU regulation No. 2003/2003. The P content of the solutions from the chemical extraction tests were analyzed by ICP-OES (CEM Mars express, Kamp-Lintfort, Germany).

#### Pot experiment

All of the Mitscherlich pots were placed in a randomized arrangement on tables sheltered from rain and birds by a transparent roof and a net. The average temperature during the day was 24°C and 13°C at night. The average sunshine duration was 8.5 h, and the air humidity was 69%. Daily watering kept the moisture content at 60% of the specific water holding capacity of the soil. The maize fresh matter from each pot was weighted 90 days after sowing, dried at 55°C and milled for sample analysis. The P mass fractions of the dried plant material were analyzed by ICP-OES (Thermo iCAP 6300 Duo, Dreieich, Germany) after microwave-assisted digestion (HNO<sub>3</sub>/H<sub>2</sub>O<sub>2</sub>; CEM Mars express, Kamp-Lintfort, Germany).

#### μ-XRF and XANES microspectroscopy

The microscope was operated under a vacuum to minimize absorption and scattering by air. The X-ray beam was monochromatized using a fixed exit double-crystal Si(111) monochromator (0.4 eV resolution). The monochromator energy was calibrated against the first derivative maximum of tricalcium phosphate (Ca<sub>3</sub>(PO<sub>4</sub>)<sub>2</sub>) at 2152.7 eV. Flux variations of the incoming beam were corrected by measuring the XRF from a Si<sub>3</sub>N<sub>4</sub> substrate upstream of the sample with a photodiode. The beam size was reduced using a pinhole (200 μm diameter) for macro-XANES analysis or focused to 0.65×0.55 (h×v) μm<sup>2</sup> with a Kirkpatrick-Baez mirror for μ-XRF and μ-XANES analyses. The XRF signal was collected using an 80 mm<sup>2</sup> Bruker Si drift diode placed at a 49° angle with respect to the sample surface.

Additional to Figure 2:

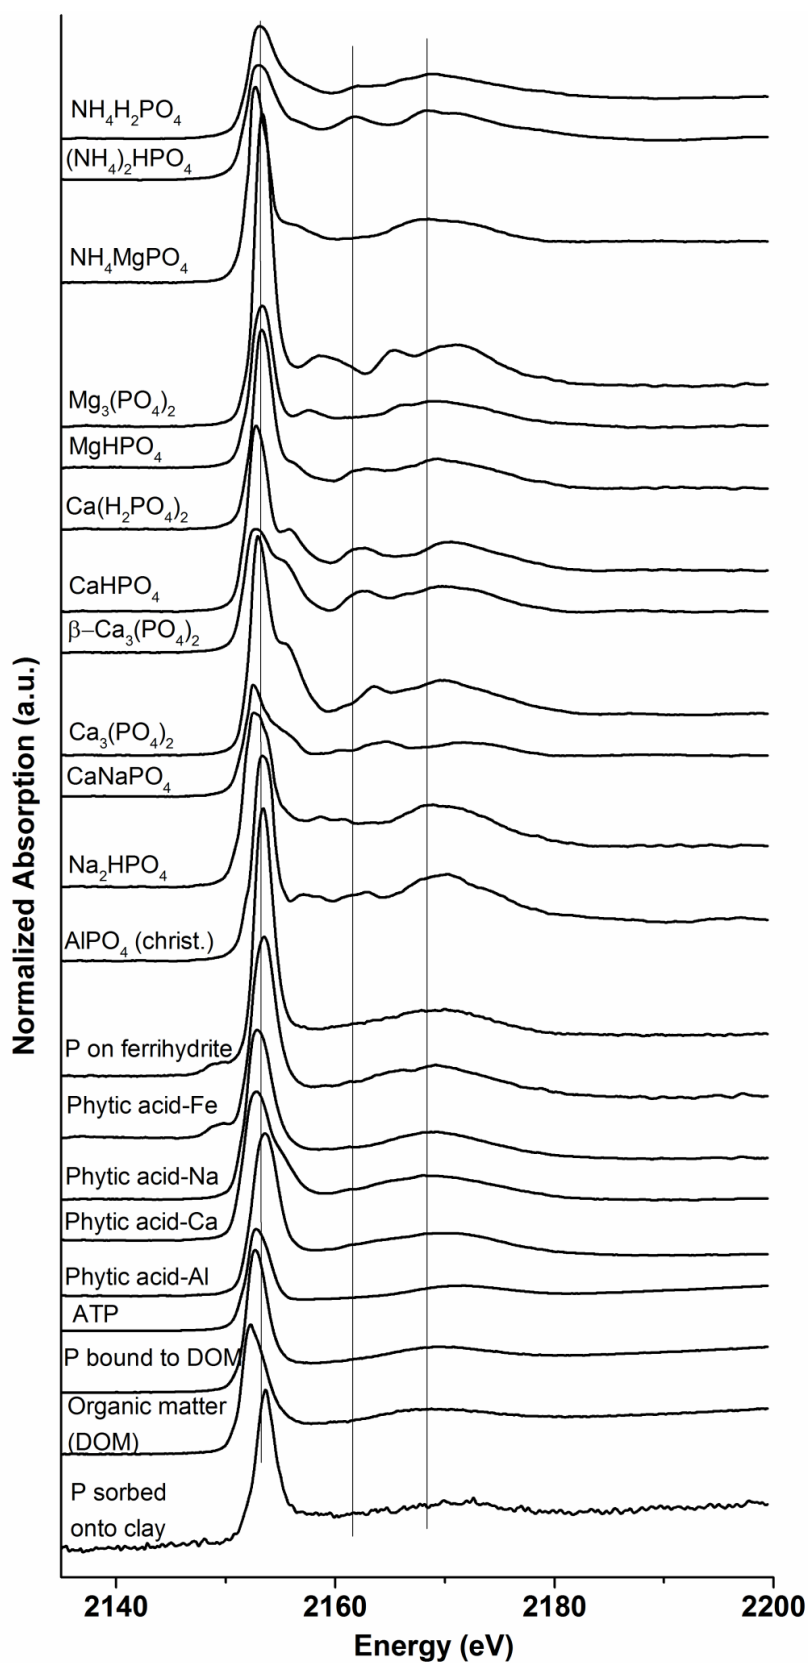

The ammonium phosphates  $\text{NH}_4\text{H}_2\text{PO}_4$  and  $(\text{NH}_4)_2\text{HPO}_4$  showed a pronounced post-edge shoulder at approximately 2157 eV as well as two characteristic oscillations at 2162 and 2167 eV. Mg-phosphates had a post-white line shoulder at ~2157 eV and one or two

oscillations between 2165 and 2180 eV. In contrast, the Ca-phosphates had a post-white line shoulder at ~2154 eV and two oscillations between 2160 and 2180 eV. This post-white line shoulder was present, but was less pronounced in the phytic acid-Ca salt spectrum, which indicated that this feature is characteristic for the Ca-phosphate group. The Na-phosphate showed a much broader white line. The white line of the Al and Fe-phosphates was slightly shifted towards a higher energy compared to the Ca- and Na-phosphates. Furthermore, the Fe-phosphates and phytic acid-Fe salt showed a pre-edge peak at ~ 2149 eV, characteristic of bound Fe<sup>3+</sup>-phosphate. The XANES spectra of the adsorbed and organic P compounds showed a less specific fingerprint, with a white line and a broad oscillation, whose position and shape varied slightly as a function of the nature of the ligand (the white line for phytic acid-Fe, phytic acid-Al salts and phosphate adsorbed on clay were shifted towards a higher energy compared to phytic acid-Ca, phytic acid-Na salts, ATP, DOM and phosphate bound to DOM (see also Khare et al., 2005; Giguet-Covex et al., 2013; Kim et al., 2015; Prietzel et al. 2016).

#### References:

- Giguet-Covex, C., J. Poulencard, E. Chalmin, F. Arnaud, C. Rivard, J.P. Jenny, J.M. Dorioz, 2013. XANES spectroscopy as a tool to trace phosphorus transformation during soil genesis and mountain ecosystem development from lake sediments. *Geochimica Cosmochimica Acta* 118:129–147.
- Khare, N., D. Hesterberg, J.D. Martin, 2005. XANES investigation of phosphate sorption in single and binary systems of iron and aluminium oxide minerals. *Environmental Science and Technology* 39:2152-2160.
- Kim, B., M. Gautier, C. Rivard, C. Sanglar, P. Michel, R. Gourdon, 2015. Effect of aging on phosphorus speciation in surface deposit of a vertical flow constructed wetland. *Environmental Science and Technology* 49:4903-4910.
- Prietzel, J., G. Harrington W. Häusler, K. Heister, F. Werner, W. Klysubun, 2016. Reference spectra of important adsorbed organic and inorganic phosphate binding forms for soil P speciation using synchrotron-based K-edge XANES spectroscopy. *Journal of Synchrotron Radiation* 23:532-544.

*Table S1:* Chemical composition of both soils

|                | P<br>mg kg <sup>-1</sup> | C<br>mg kg <sup>-1</sup> | N<br>mg kg <sup>-1</sup> | K<br>mg kg <sup>-1</sup> | Mg<br>mg kg <sup>-1</sup> | Ca<br>mg kg <sup>-1</sup> |
|----------------|--------------------------|--------------------------|--------------------------|--------------------------|---------------------------|---------------------------|
| Soil pH<br>7.1 | 117                      | 9450                     | 430                      | 410                      | 6210                      | 10920                     |
| Soil pH<br>4.9 | 114                      | 1440                     | 240                      | 340                      | 220                       | 380                       |

*Figure S1:* Phosphorus K-edge macro-XANES spectra of the unfertilized soil (bottom) and soils from the pot experiments fertilized with SSA-Mg, SSA-Na and struvite, respectively, analyzed after harvest (soil fraction <200  $\mu\text{m}$ )

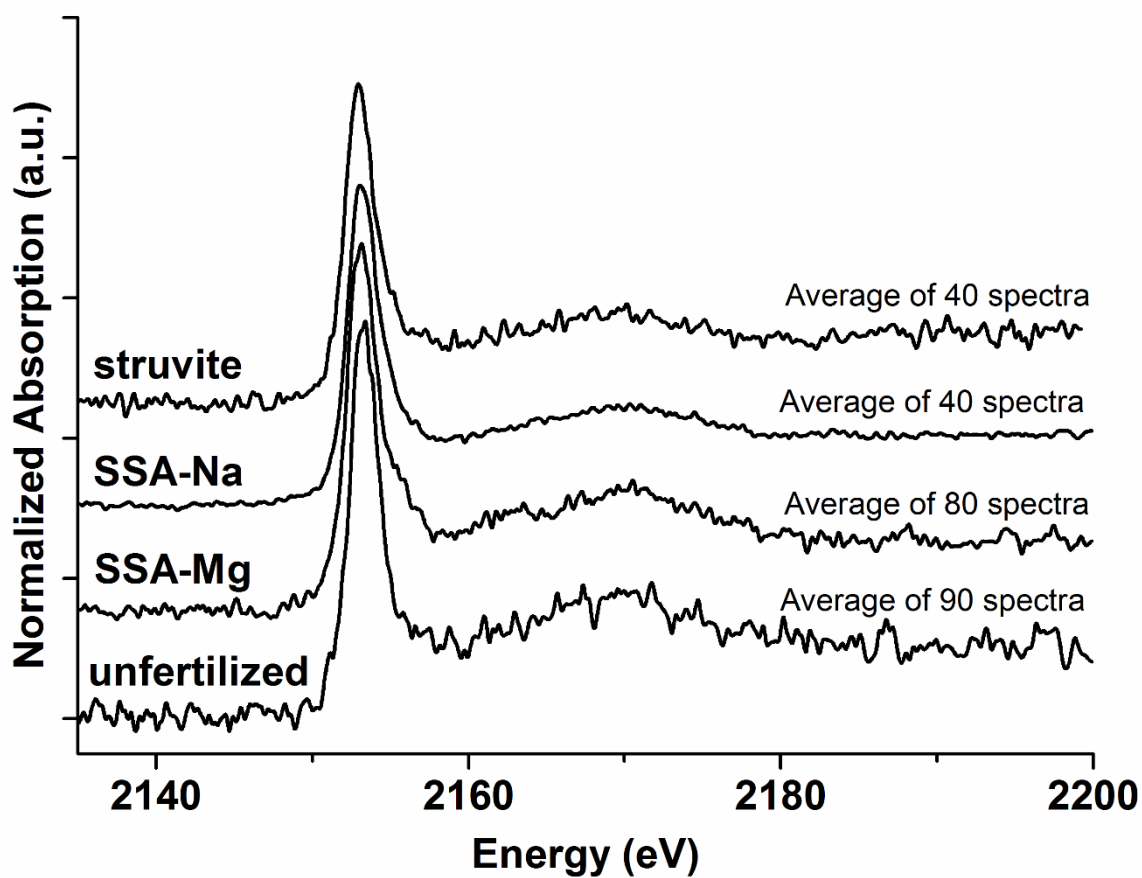

*Figure S2:* XRF map of P, Si and Al (left bottom; 1085 x 690  $\mu\text{m}^2$ , 5  $\mu\text{m}$  step, color scale is arbitrary), P map with selected points of interest for  $\mu$ -XANES (left top; red = high concentration, blue = low concentration) and  $\mu$ -XANES spectra (right) of the unfertilized soil (fraction < 200  $\mu\text{m}$ ) embedded into resin. Spectra 1-5 are attributed to organic or adsorbed phosphate and spectra 6 and 7 to apatite.

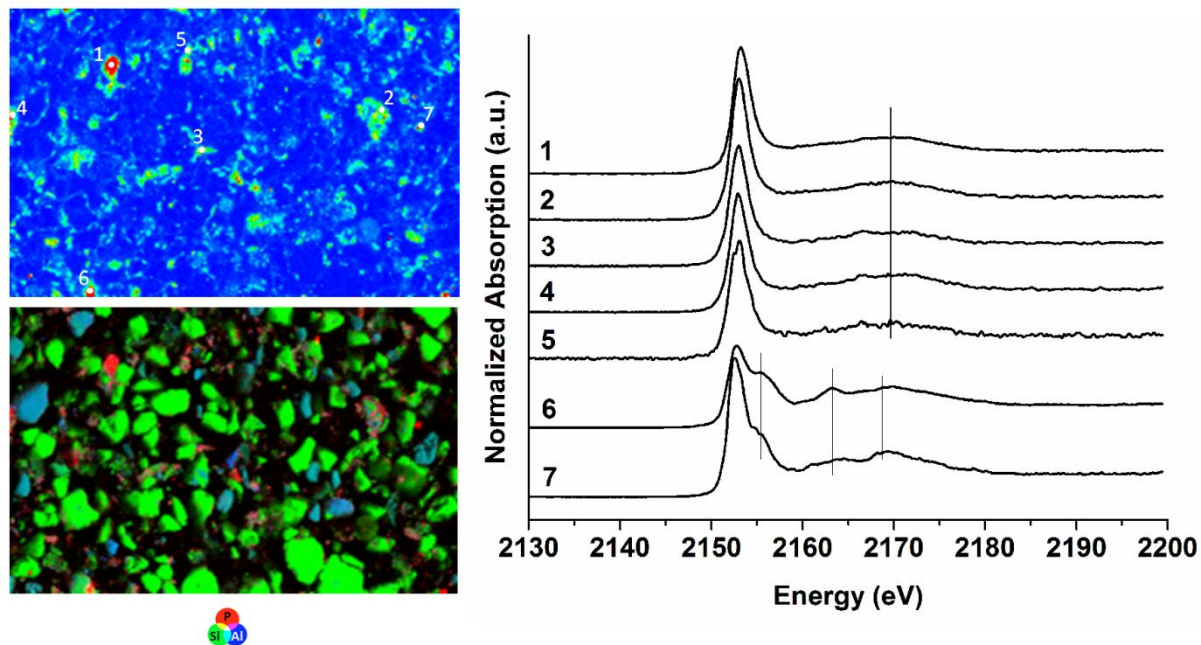

*Figure S3:* XRF map of P, Si and Al (left bottom; 1000 x 710  $\mu\text{m}^2$ , 5  $\mu\text{m}$  step, color scale is arbitrary), P map with selected points of interest for  $\mu$ -XANES (left top; red = high concentration, blue = low concentration) and  $\mu$ -XANES spectra (right) of soil from pot experiments of SSA-Na before sowing (fraction < 200  $\mu\text{m}$ ) embedded into resin. Spectra 1-5 are attributed to organic or adsorbed phosphate; spectra 6-9 to ammonium phosphate and spectrum 10 to apatite.

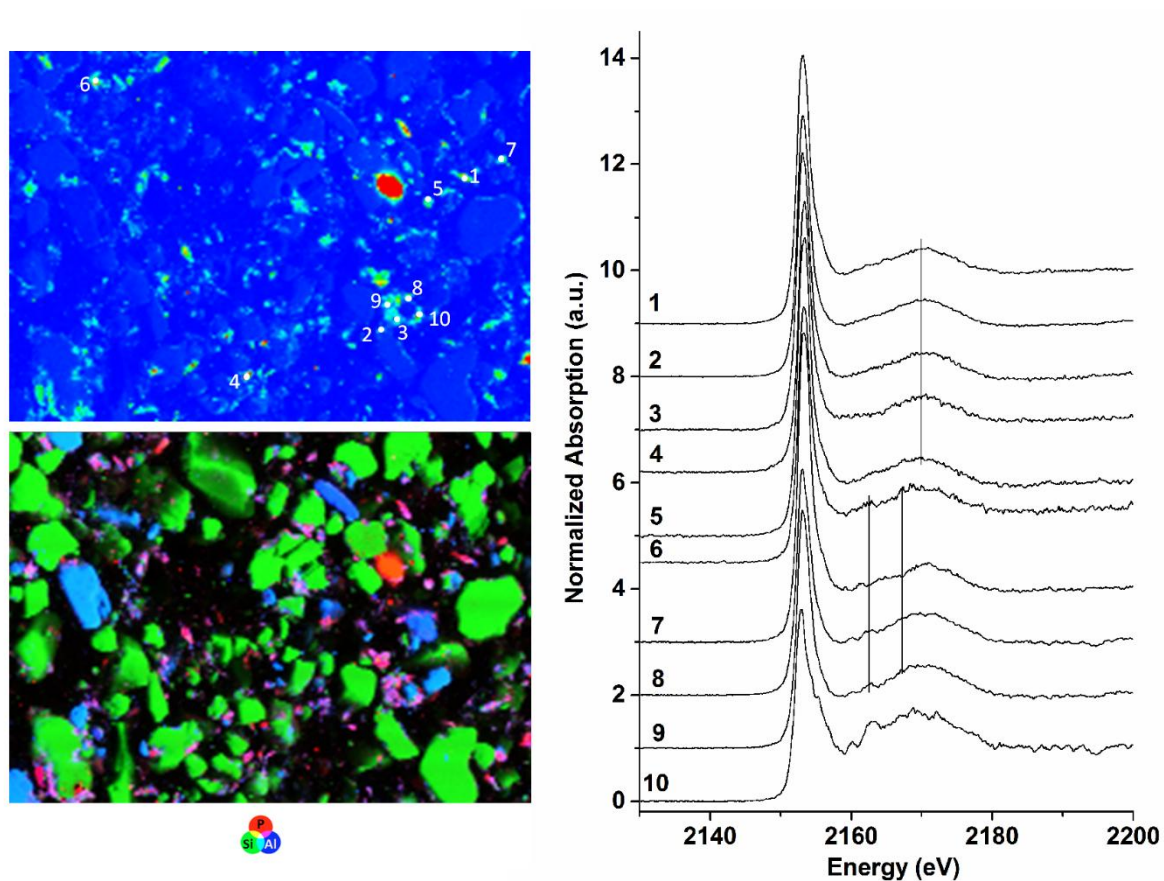



*Figure S4:* Elemental correlation maps for the unfertilized and fertilized soils (< 200  $\mu\text{m}$  sieved fraction). Spatial resolution is 5  $\mu\text{m}$ . The sample way of preparation (resin embedded or dropped on adhesive tape) is indicated for each sample. A common color scale is used for unfertilized and SSA-Mg samples (c1). A common color scale is used for SSA-Na samples (c2), with  $c2 = \alpha c1$  where  $\alpha$  is a constant because the latter samples were analyzed during a second experiment run, without the same electron beam intensity in the synchrotron ring (and so without the same flux on the sample and same XRF detector position).

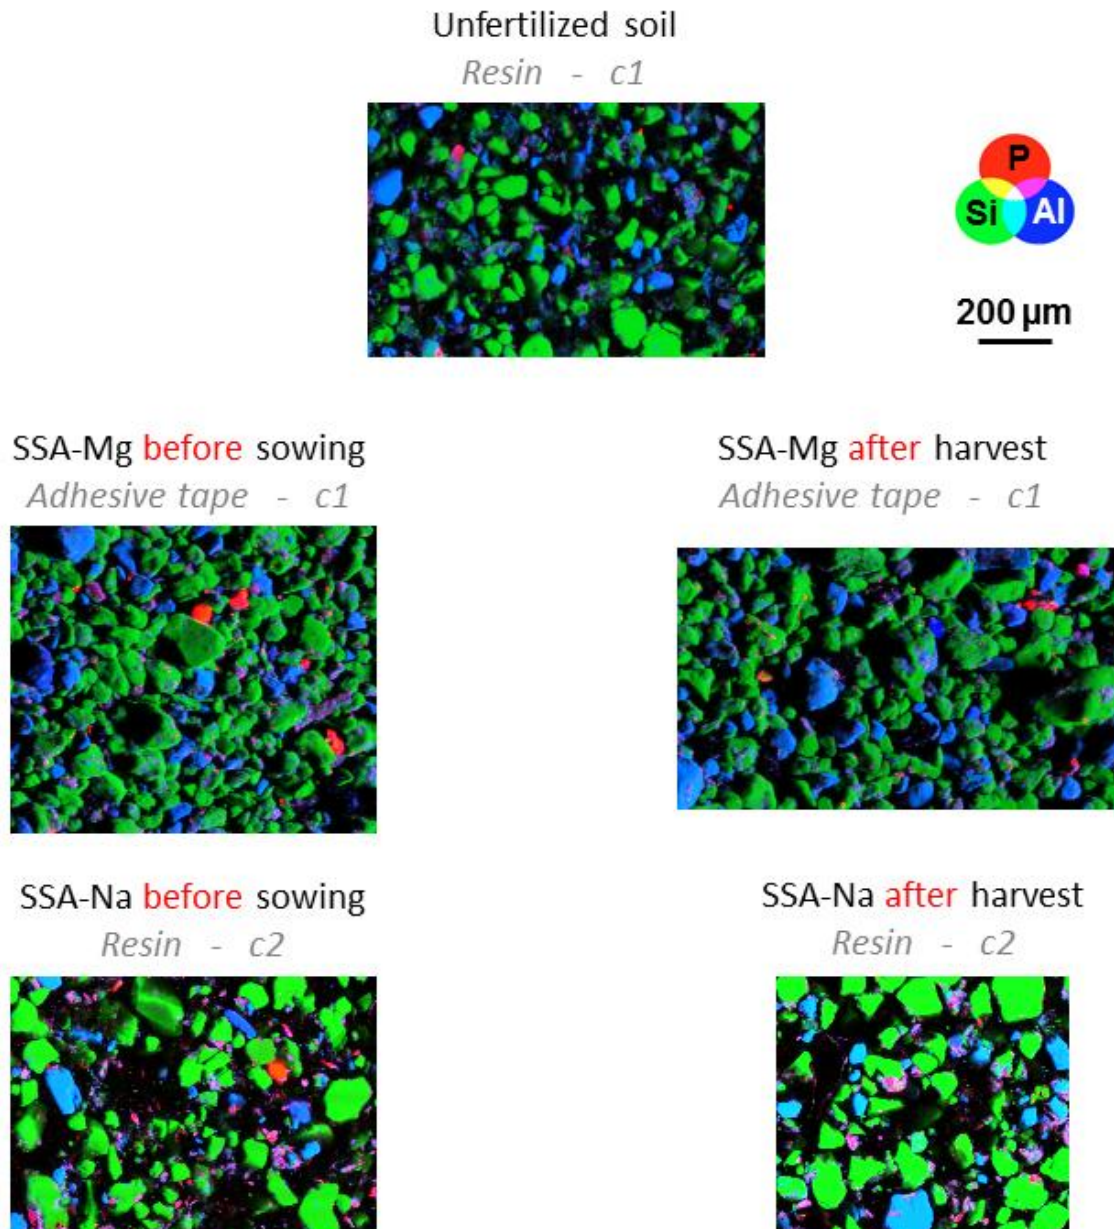

*Figure S5:* Elemental correlation maps for the SSA-Mg before sowing and after harvest (< 200  $\mu\text{m}$  sieved fraction). Spatial resolution is 5  $\mu\text{m}$ . The samples were dropped on adhesive tape. A common color scale is used for these two samples.

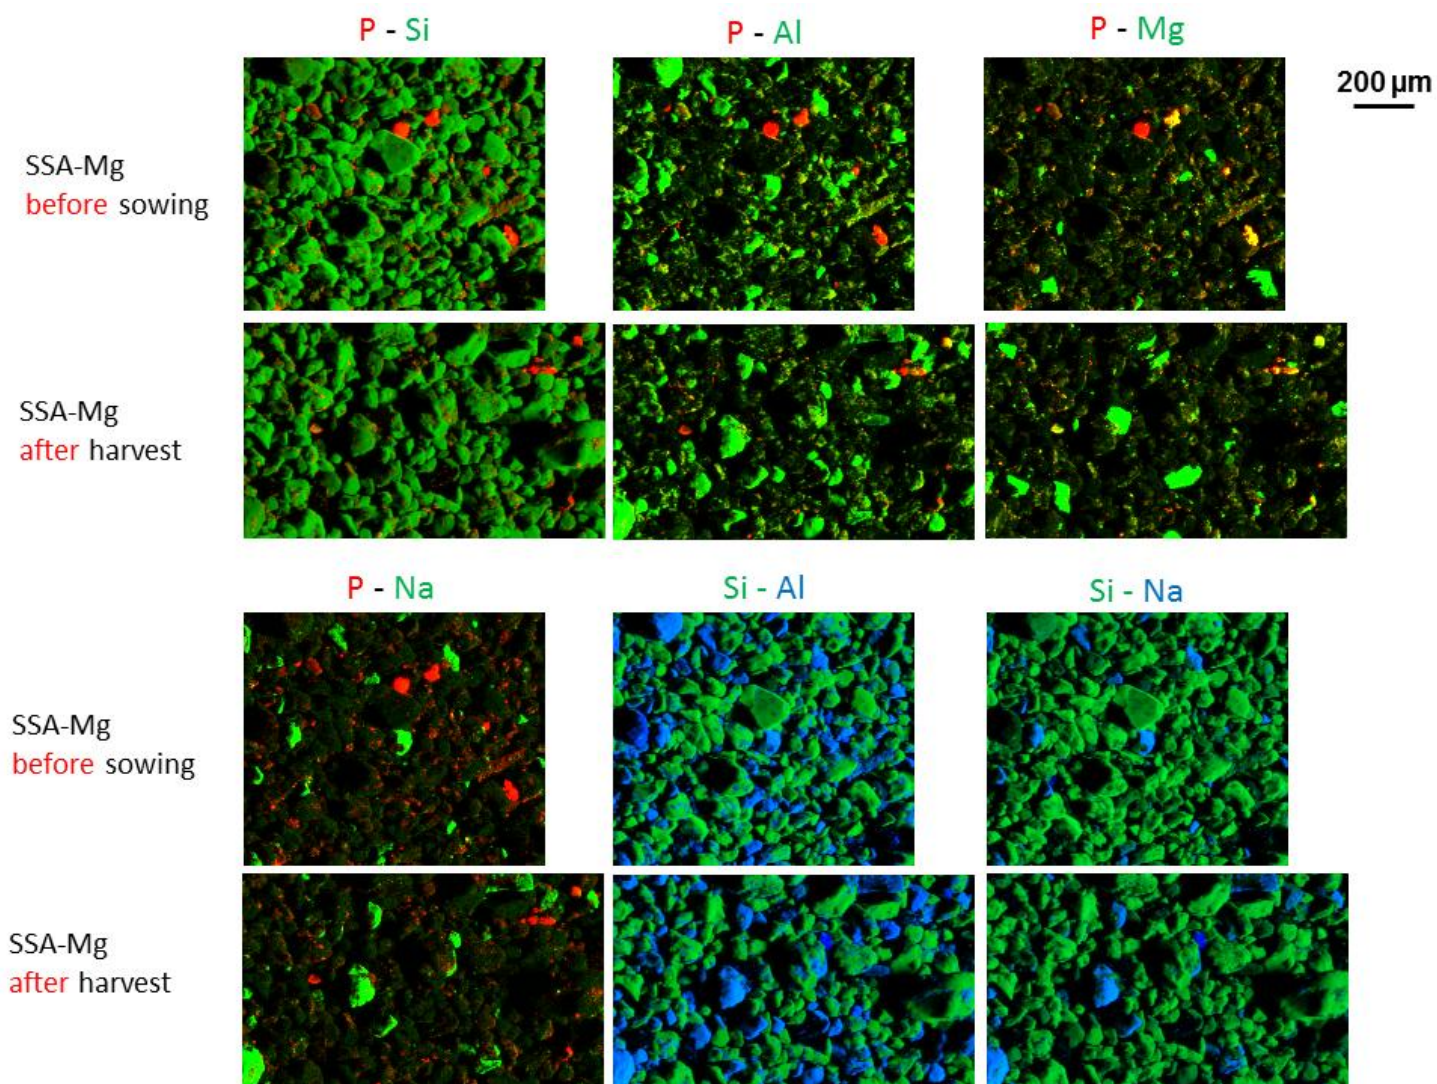

*Figure S6:* Elemental correlation maps for the SSA-Na before sowing and after harvest (< 200  $\mu\text{m}$  sieved fraction). Spatial resolution is 5  $\mu\text{m}$ . The samples were embedded in resin. A common color scale is used for these two samples.

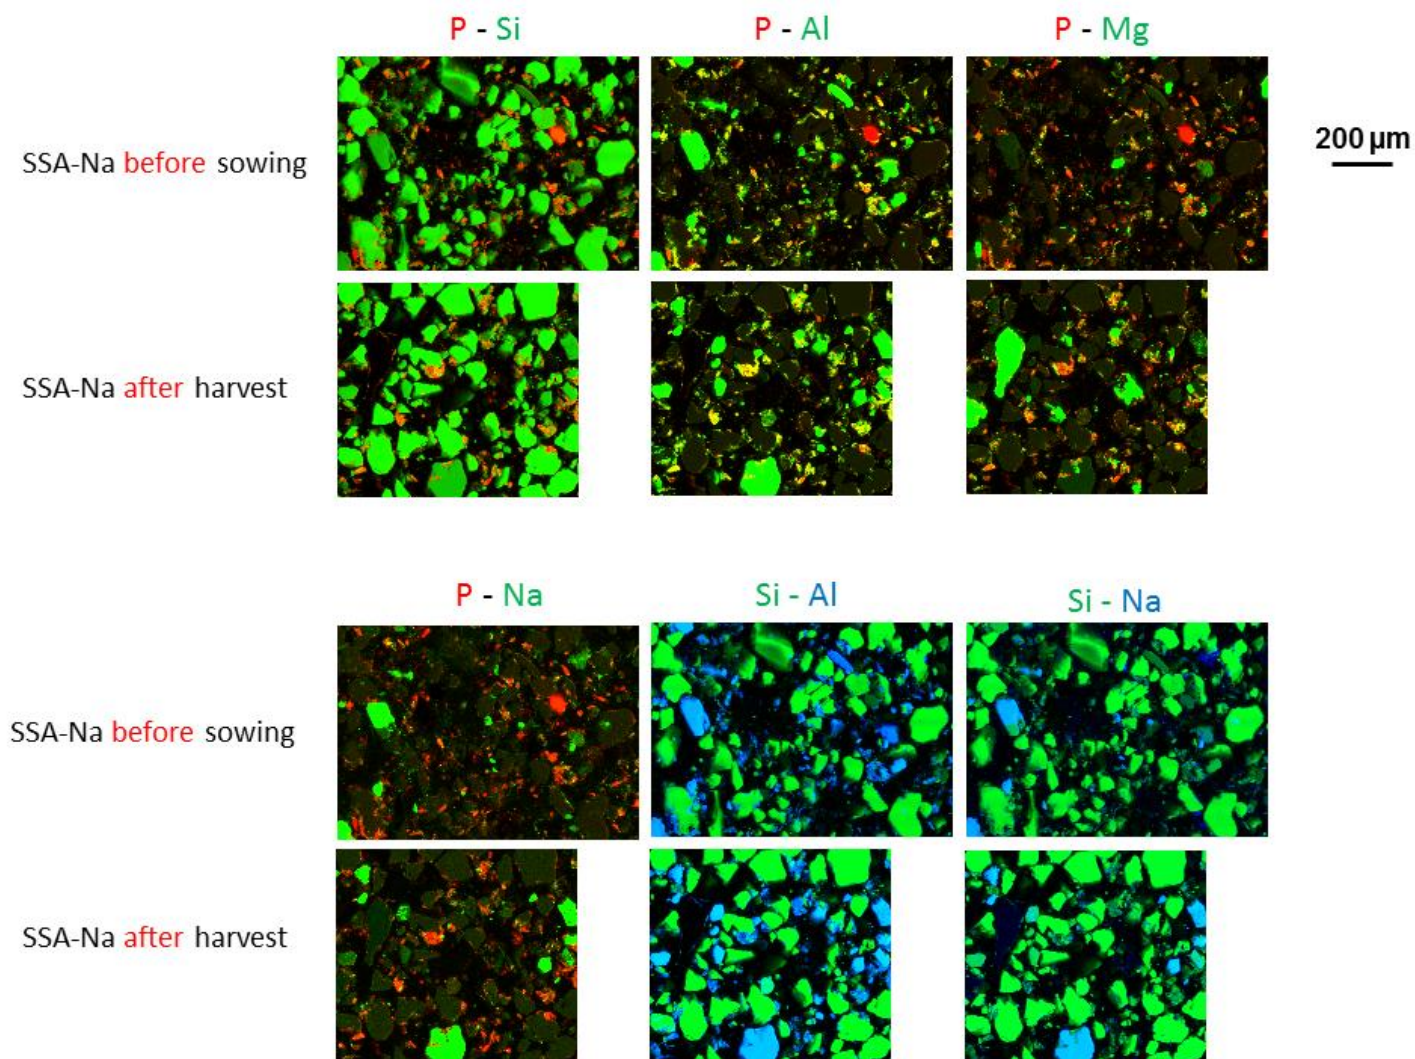

Figure S7: P-Si scatter plots of the  $\mu$ -XRF data from the different soils. The points encircled in the red ellipse correspond to the P-rich hotspot indicated by the arrow on the map.

## P - Si

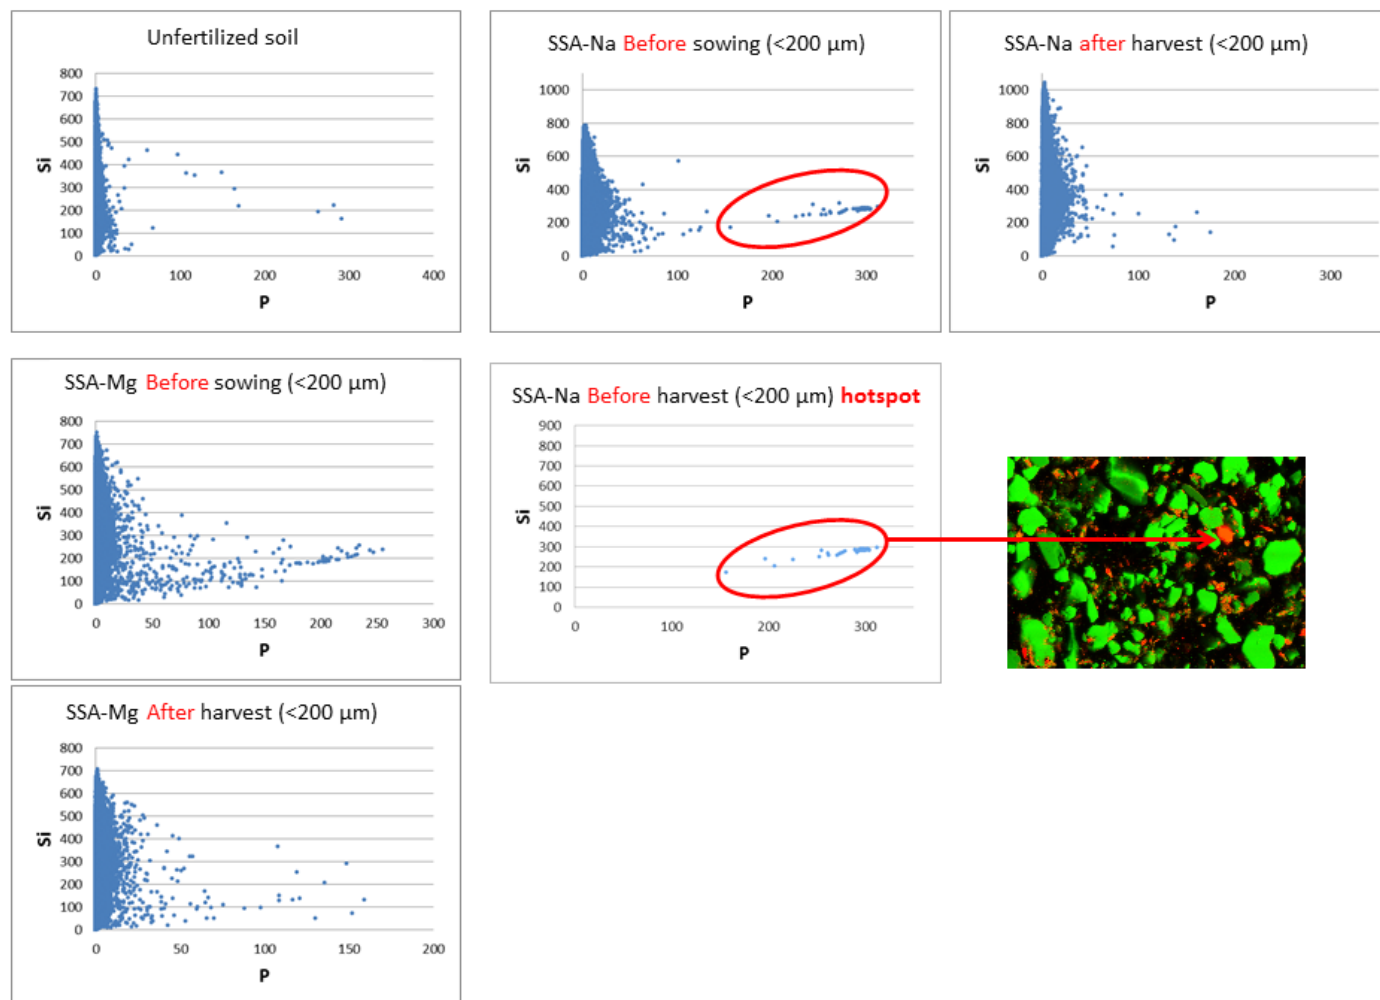

Figure S8: P-Al scatter plots of the  $\mu$ -XRF data from the different soils

P - Al

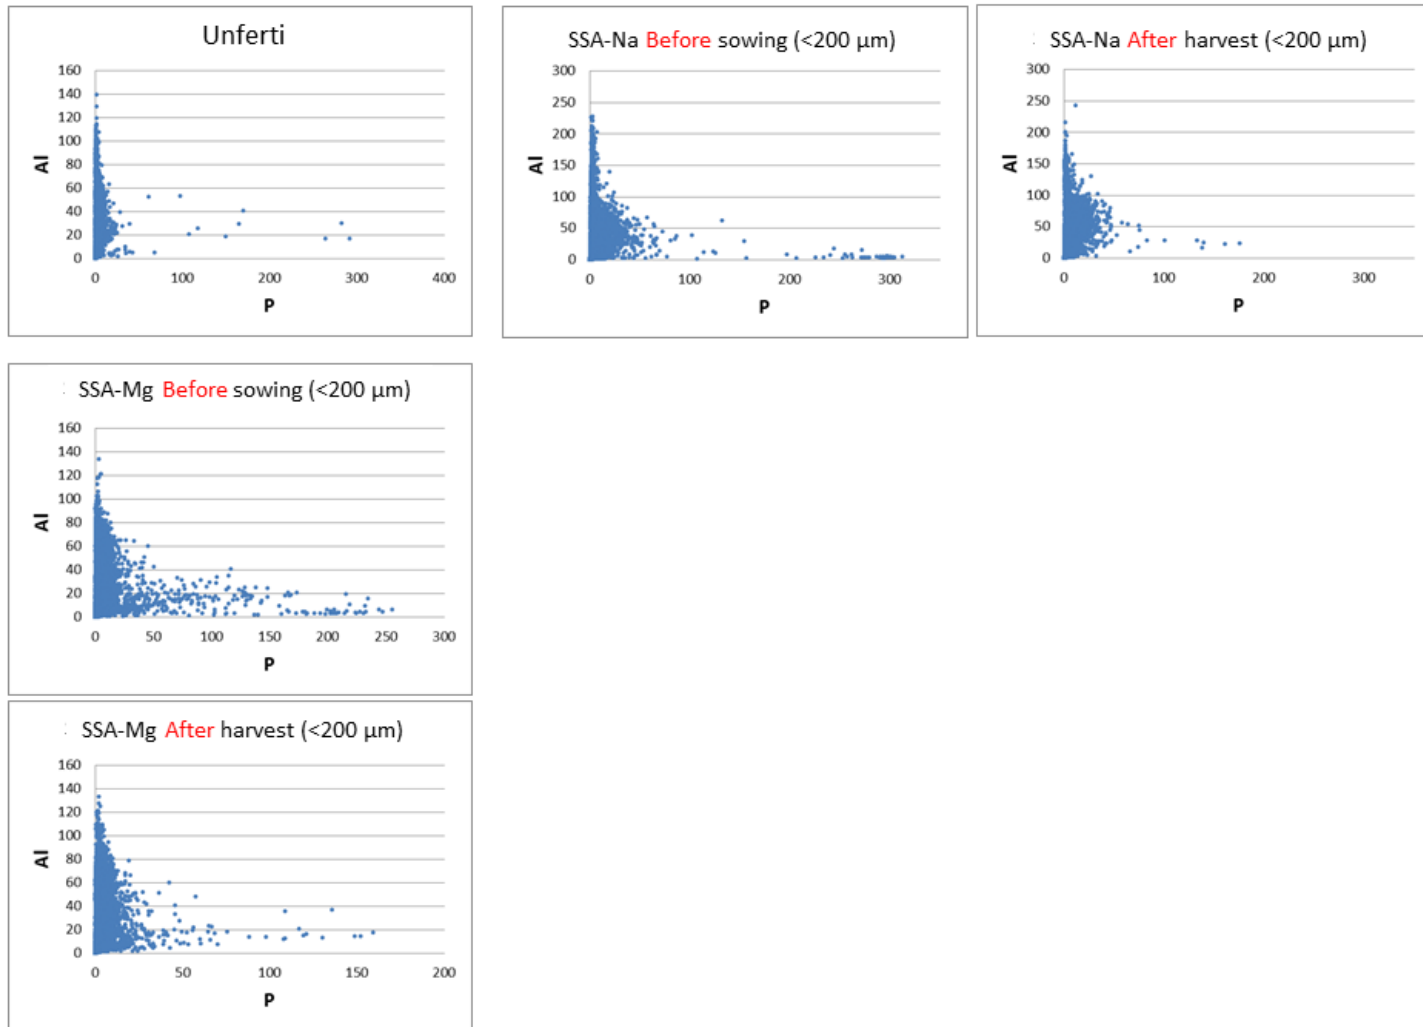

Figure S9: P-Mg scatter plots of the  $\mu$ -XRF data from the different soils

### P - Mg

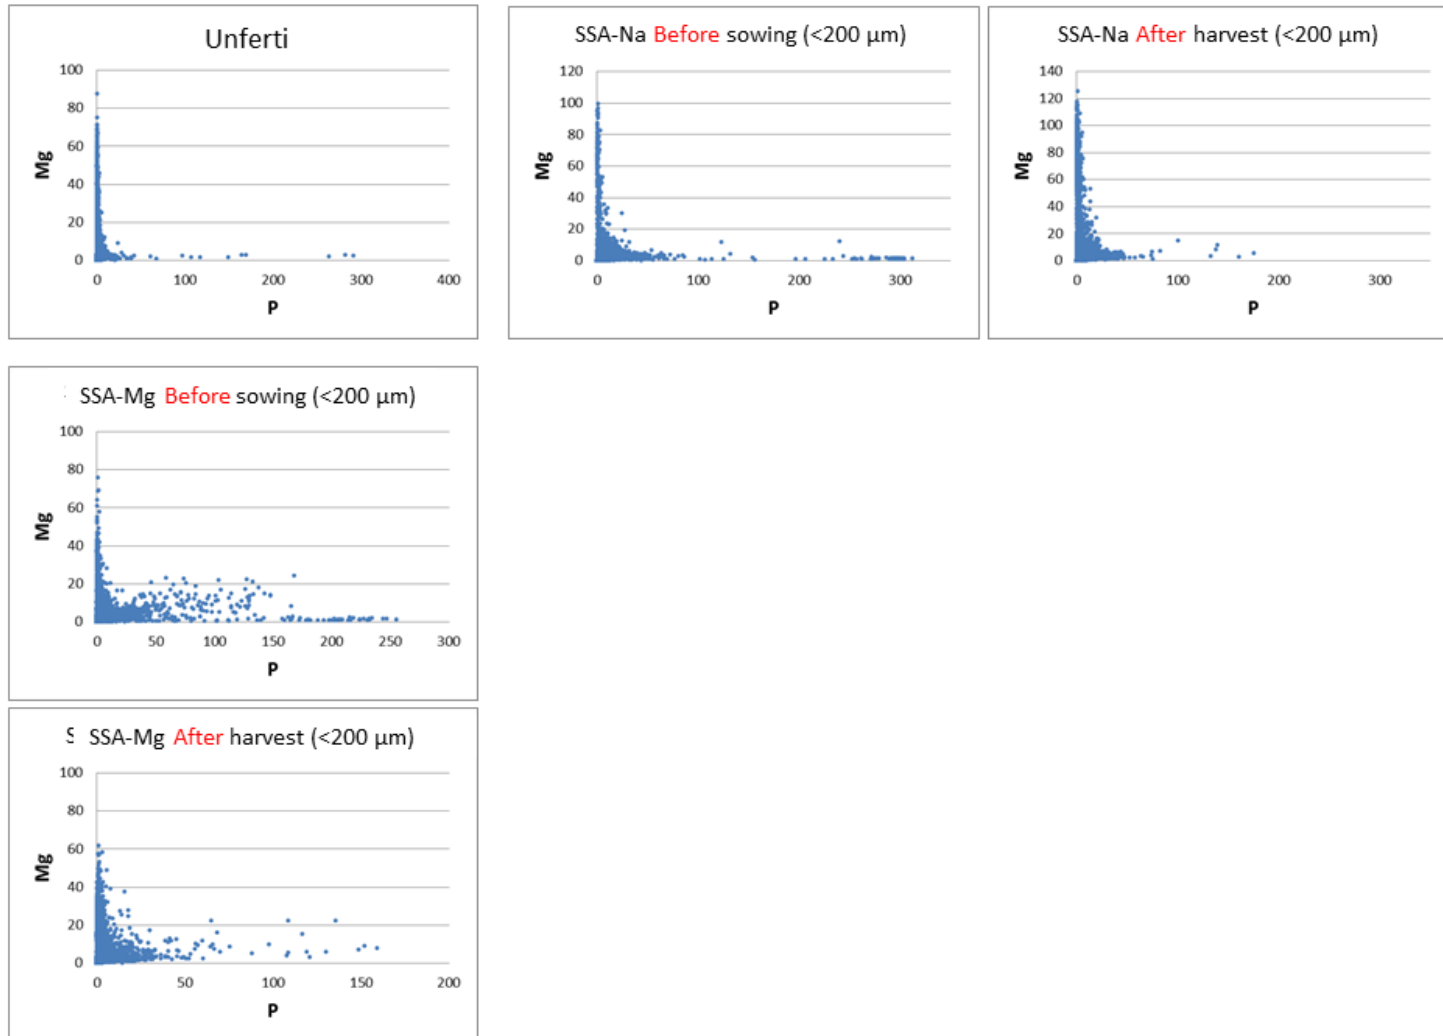

Figure S10: P-Na scatter plots of the  $\mu$ -XRF data from the different soils

### P - Na

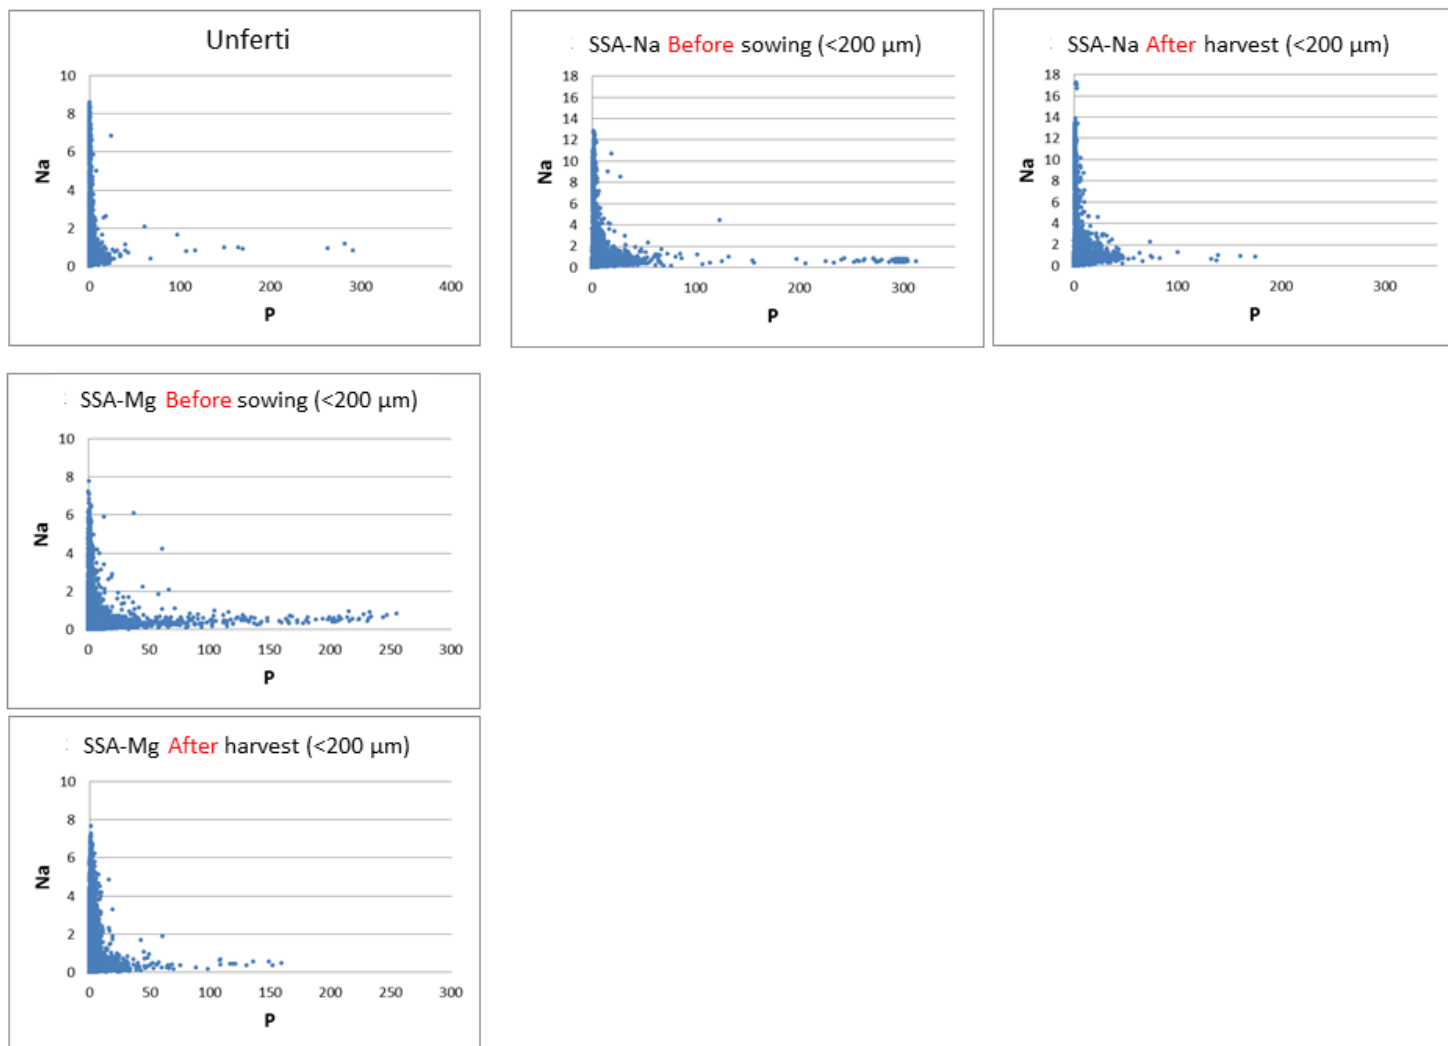

Figure S11: Al-Si scatter plots of the  $\mu$ -XRF data from the different soils

### Al – Si

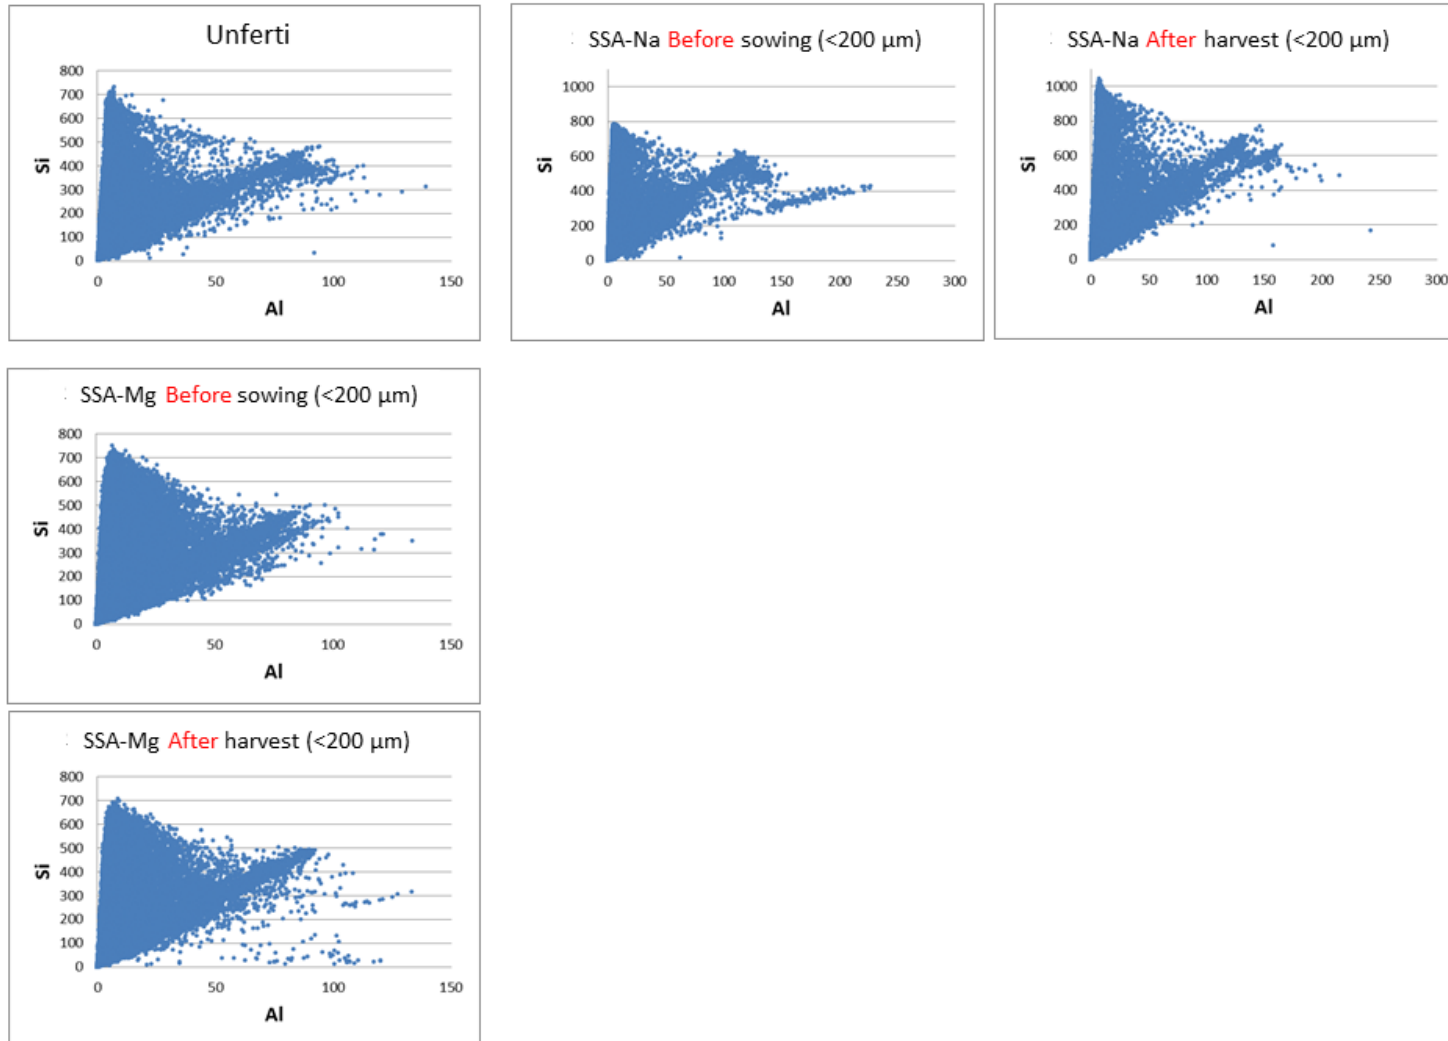



Figure S12: Na-Si scatter plots of the  $\mu$ -XRF data from the different soils

Na – Si

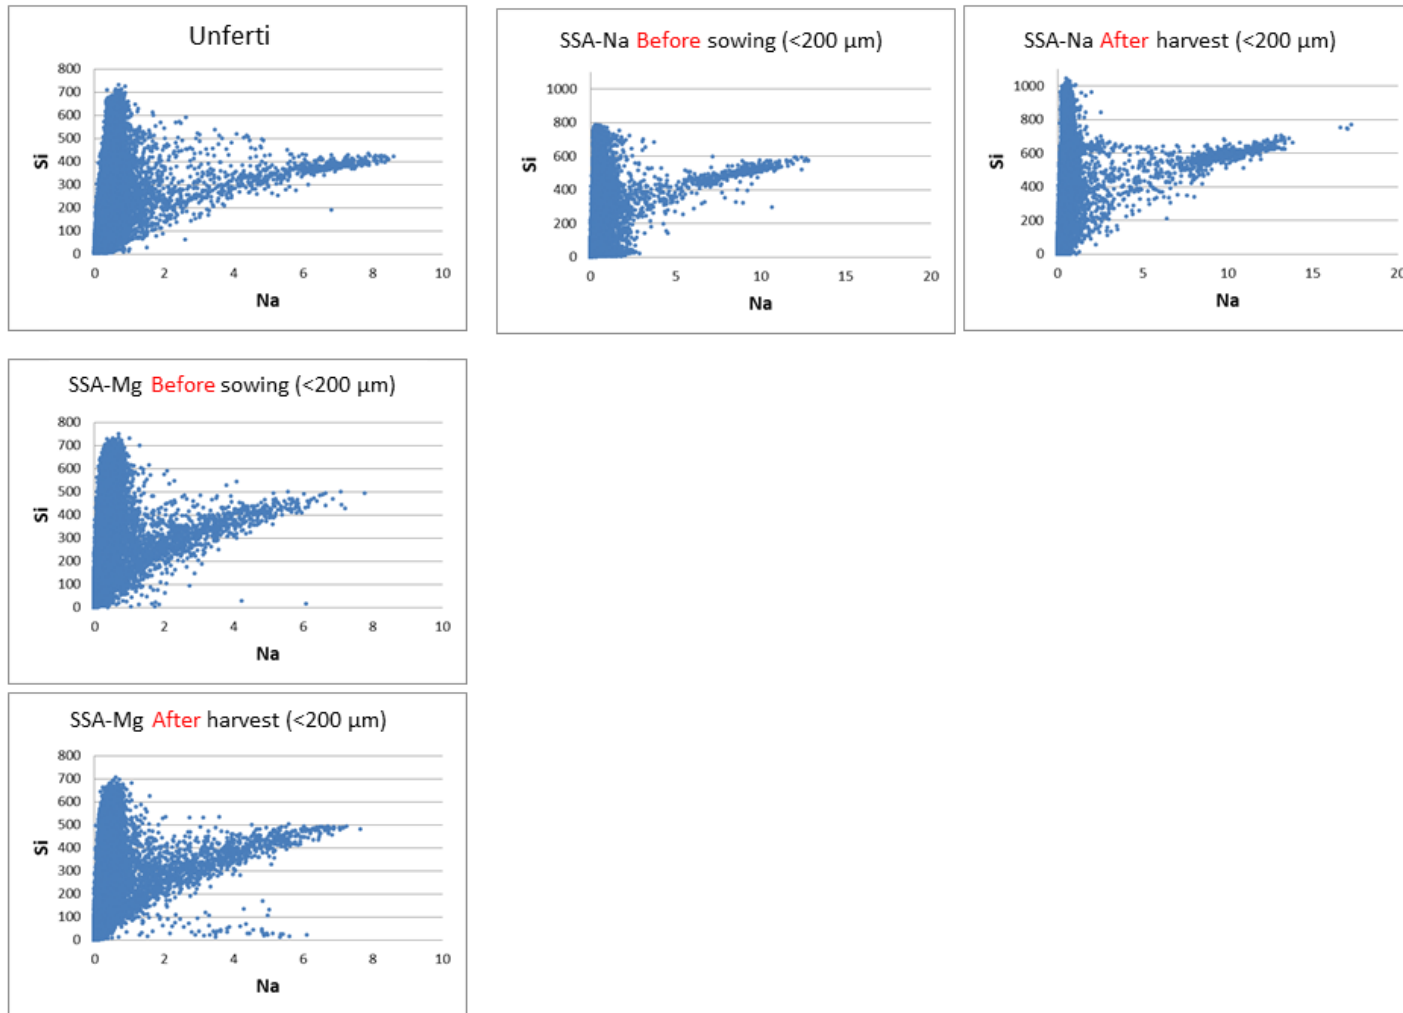

Best fits of LCFs of the sieved fractions of SSA-Mg before sowing and after harvest:

Figure S13:

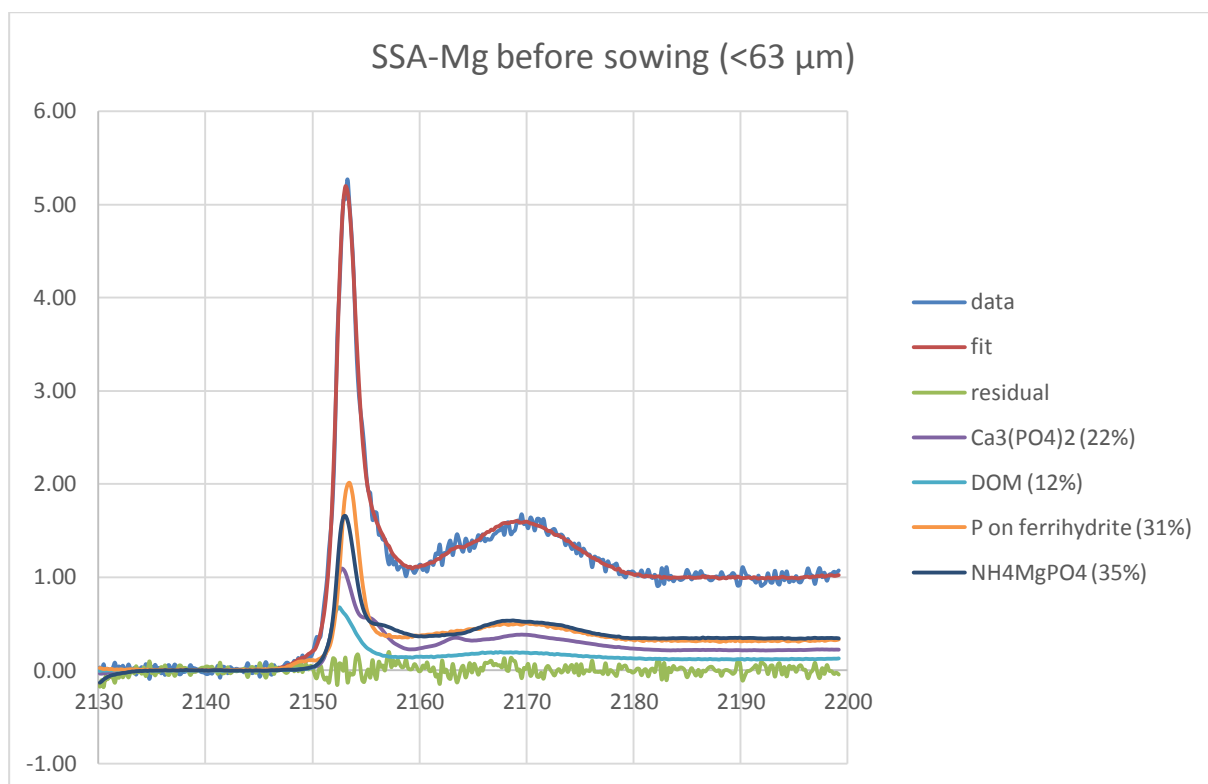

Figure S14:

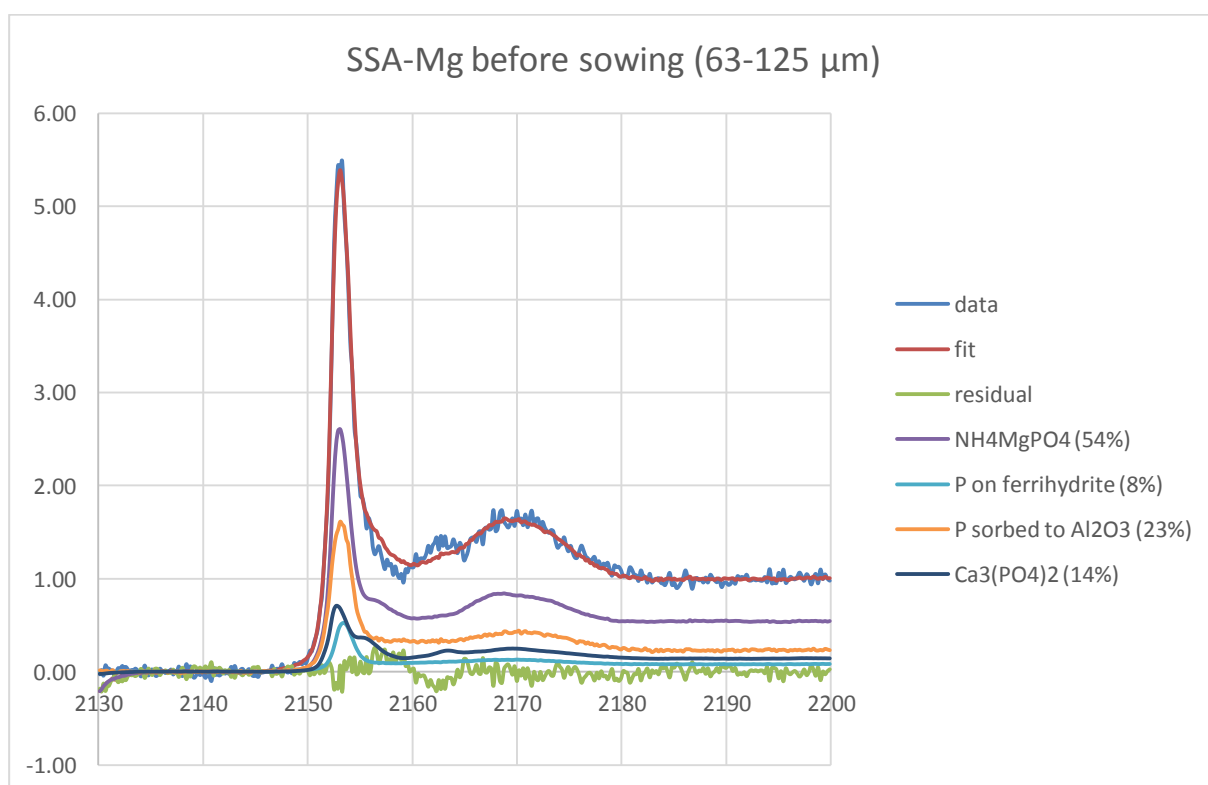

**Figure S15:**

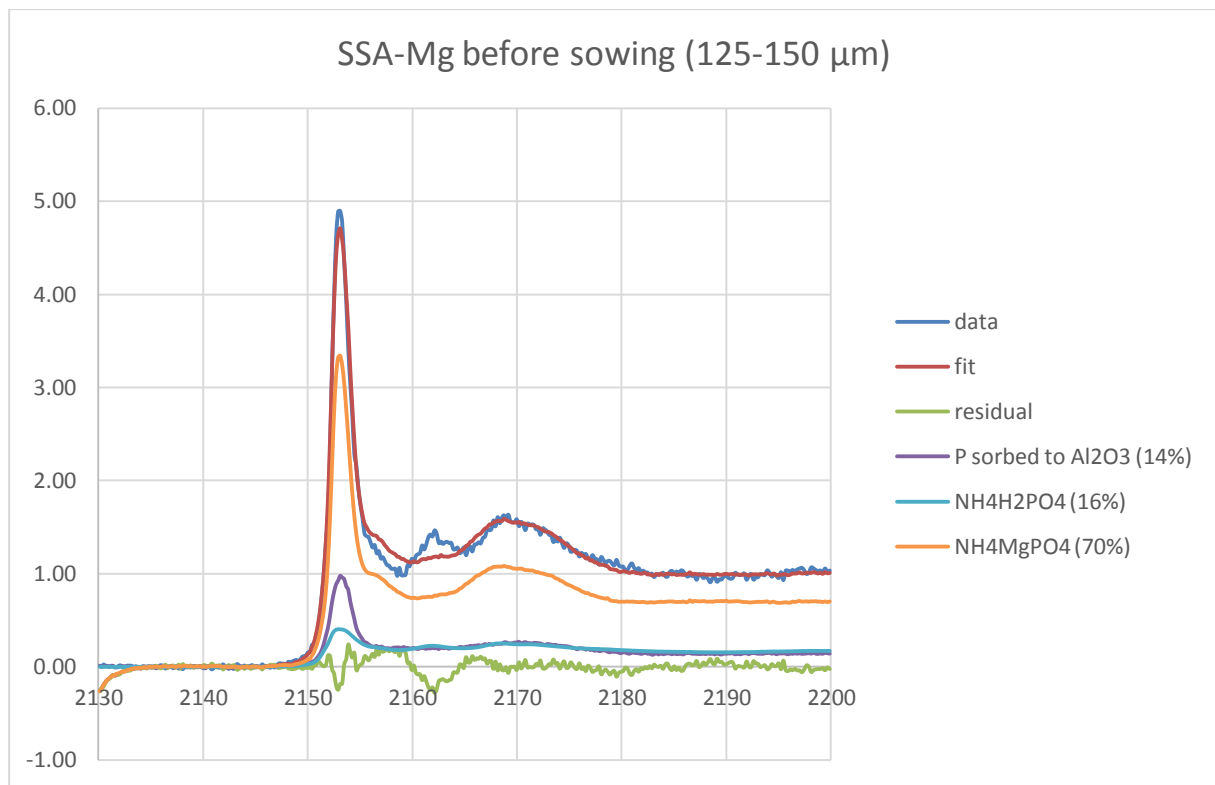

**Figure S16:**

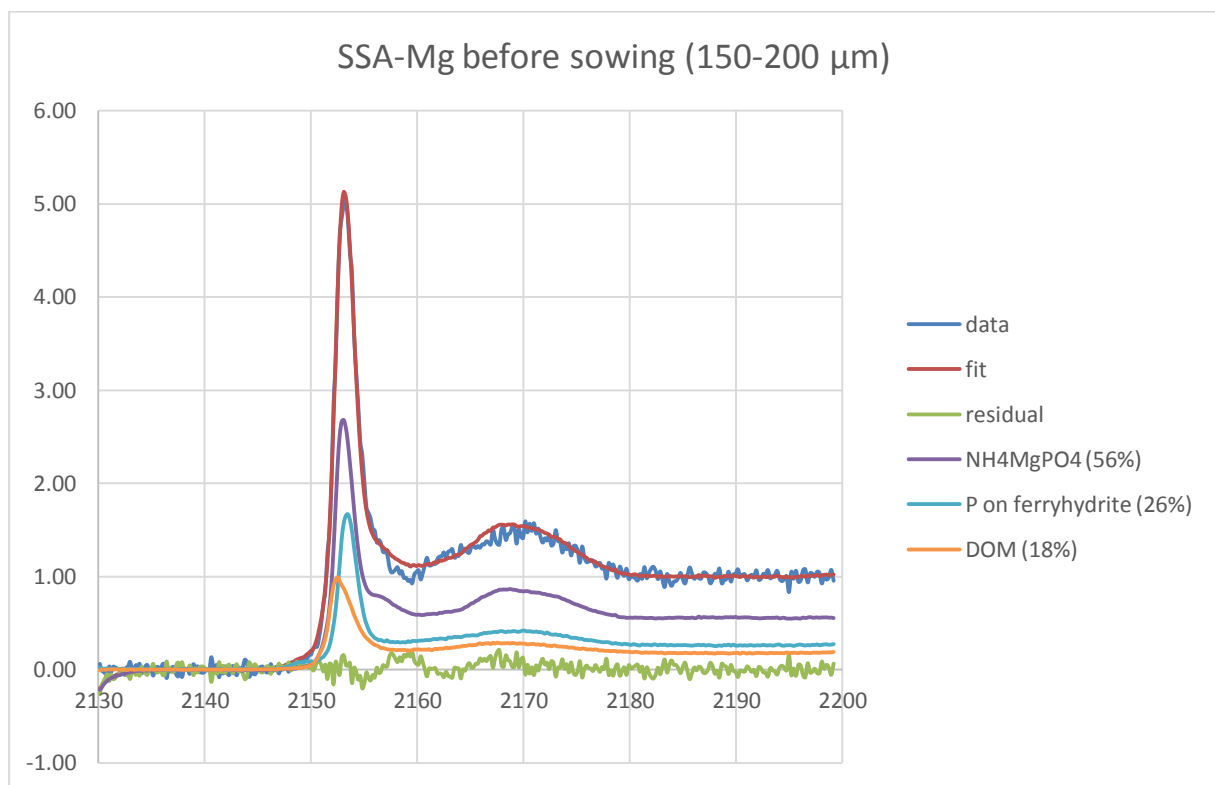

*Figure S17:*

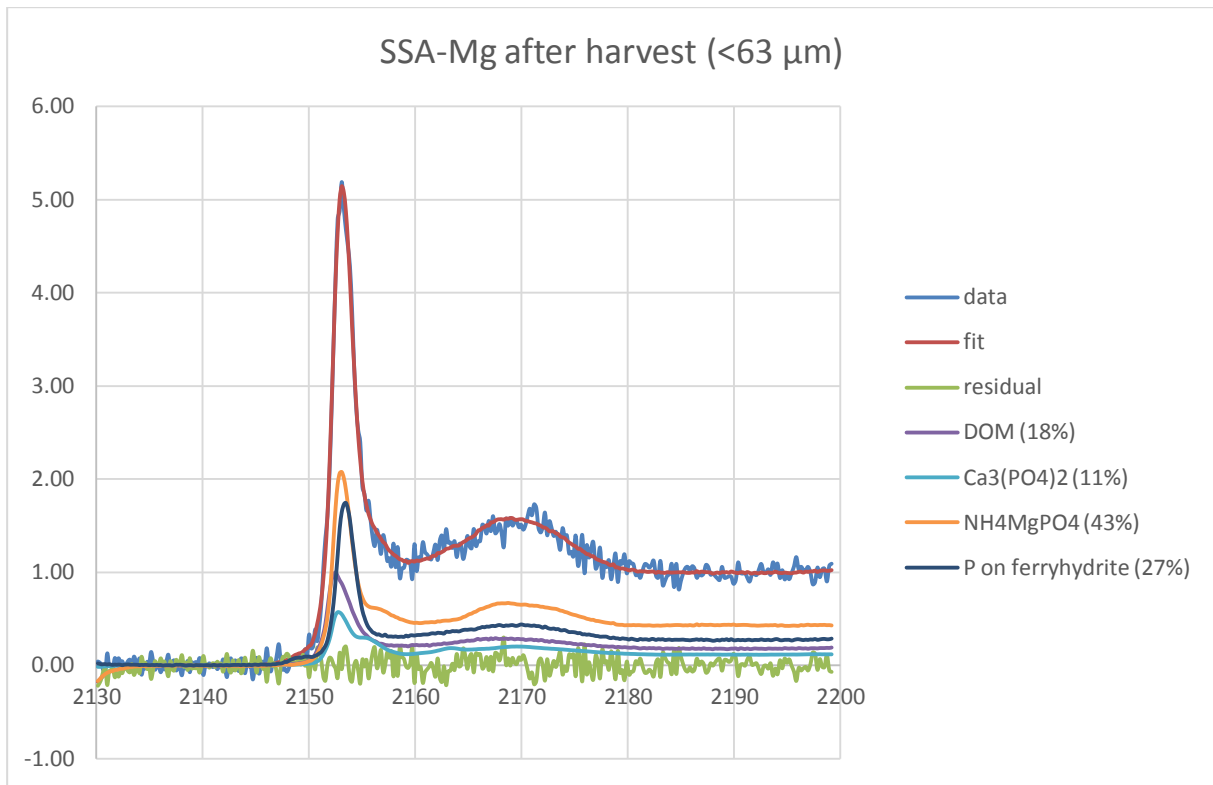

*Figure S18:*

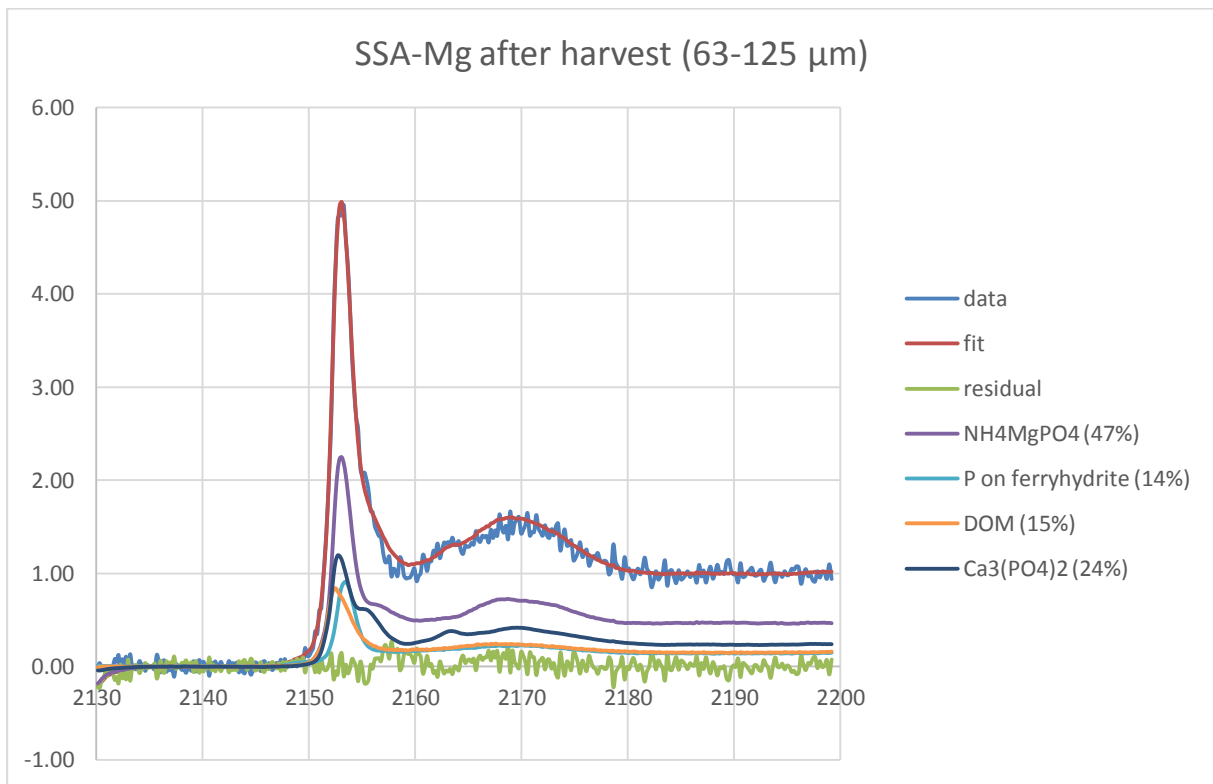

*Figure S19:*

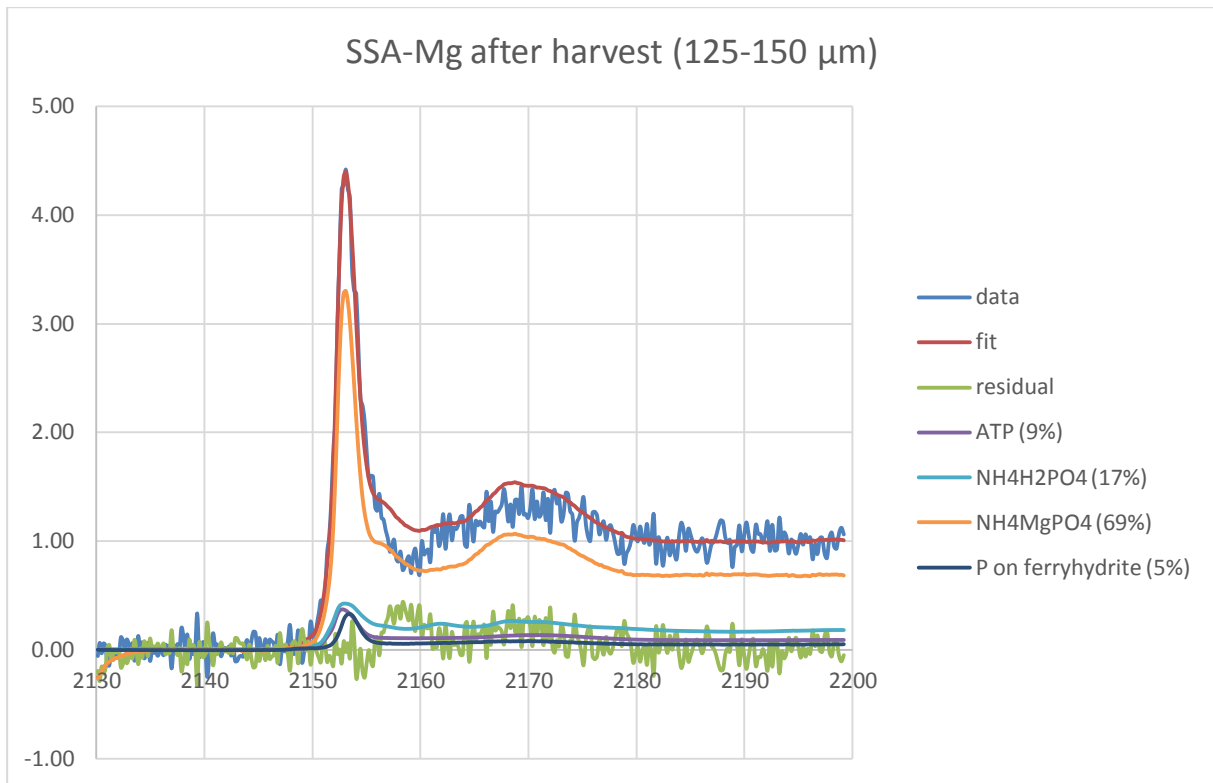

*Figure S20:*

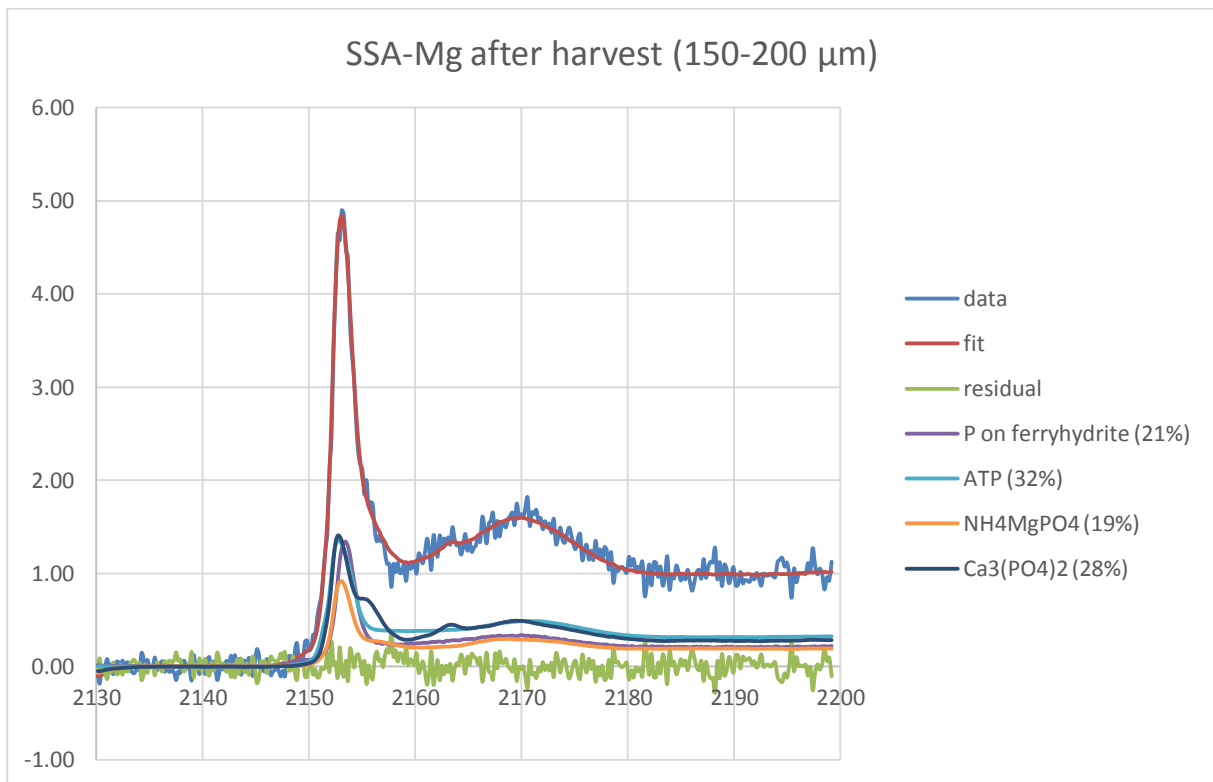

Supplement: MOESM1 [file 15654960]
